# Supplementary material for: Diets and Stable Isotope Signatures of Native and Nonnative Leucisid Fishes Advances Our Understanding of the Yellowstone Lake Food Web
Source: MDPI journal article supplement (doi:10.3390/fishes6040051), 2021-10-20
Supplement: s1 [file s1]

## Supplementary Materials

**Table S1.** Number and location of species collected.

|                 |                   | Species        |               |           |
|-----------------|-------------------|----------------|---------------|-----------|
|                 |                   | Redside Shiner | Longnose dace | Lake chub |
| <b>Location</b> | Holmes Point      | 9              | 31            | 10        |
|                 | Grant Marina      | 9              | 1             | 8         |
|                 | Thomas Bank       | 0              | 1             | 2         |
|                 | Carrington Island | 1              | 0             | 1         |
|                 | Boathouse         | 7              | 10            | 1         |
|                 | Bridge Bay Marina | 13             | 7             | 0         |
|                 | Snipe Point       | 5              | 0             | 0         |
